# Supplementary material
Source: Research Square preprint supplement (doi:10.21203/rs.3.rs-9665889/v1)
Supplement: Supplementary file 1 [file 3fc6dedfd791e024b53b0b4d.docx]

**GEOSITE DATA SHEET : PN-01**

| **CATEGORY** | **SPECIFICATIONS** |
| --- | --- |
| **Identification** | Name: Négop-Ghang Lake | ID: PN-01 | Group: Phreatomagmatic (Maars) |
| **Location** | Coordinates: 5°32'38" N, 10°33'38" E (approx.) | Avg. Altitude : ~1150 m |
| **Morphology** | Type: Sub-rounded maar | Breach: SE | Basement: Basaltic plateaus |

**1. Scientific & Morphological Description**

- Genesis: Hybrid eruption starting with phreatomagmatic explosions (crater excavation) followed by a Strombolian phase (scoria cone building) as the aquifer dried up.
- Lithology: Layered pyroclastic sequence (10–20 m). Mix of vesicular tephra and older basaltic fragments (5–15 cm).
- Morphometry: Crater depth ~23 m; Scoria cone elevation ~60 m above the plain.
- Unique Feature: Pahoehoe lava flows with pressure ridges located at the base of the breach.

**2. Quantitative Assessment [1]**

| **Indicator** | **Score (/400)** | **Justification** |
| --- | --- | --- |
| Scientific Value (SV) | 325 | High representativeness of the eruptive transition from hydromagmatic to magmatic. |
| Potential Educational Use (PEU) | 310 | High didactic potential for explaining volcanic kinetics and stratigraphic layers. |
| Potential Touristic Use (PTU) | 280 | Aesthetic value of the lake and distinct biological diversity. |
| Degradation Risk (DR) | 320 | CRITICAL: High anthropogenic pressure due to intensive agriculture on slopes. |

**3. Management & Culture**

- Cultural Value: Informal traditional protection by local Bamoun chiefdoms.
- Accessibility: High (accessible by motorcycle/4x4 through the SE breach).
- Recommendation: Installation of interpretive panels focusing on "Water vs. Fire" eruptive dynamics.

**GEOSITE DATA SHEET : PN-02**

| **CATEGORY** | **SPECIFICATIONS** |
| --- | --- |
| **Identification** | Name: Lake Mfouet| ID: PN-02 | Group: Phreatomagmatic (Maars) |
| **Location** | Coordinates: 5°32'14" N, 10°34'56" E | Avg. Altitude : ~1170 m |
| **Morphology** | Type : Elliptical Tuff-cone | Shape : 500 x 300 m | Basement: Granito-gneissic |

**1. Scientific & Morphological Description**

- Genesis: Pure phreatomagmatic eruption (Tuff-cone). Strong heat input confirmed by thermally oxidized red-brick lapilli.
- Lithology: Black and red scoriaceous lapilli (2–60 mm); bombs and blocks embedded in fine ash.
- Morphometry: Soft internal walls (25-30°); 58 m deep lacustrine basin. Secondary dry crater on the ENE wall.
- Unique Feature: Emerald-green water resulting from optical reflection of the lacustrine bottom.

**2. Quantitative Assessment [1]**

| Indicator | Score (/400) | Justification |
| --- | --- | --- |
| Scientific Value (SV) | 365 | Exceptional regional rarity and pristine integrity. |
| Potential Educational Use (PEU) | 340 | High didactic legibility of tuff-cone structural features. |
| Potential Touristic Use (PTU) | 365 | MAX: Iconic water color and high scenic beauty. |
| Degradation Risk (DR) | 180 | Low; protected by local community and traditional sacred beliefs. |

3. Management & Culture

- Cultural Value: High (Sacred Site). Used for Bamoun initiation rituals; folklore attributes mystical curative properties to the lake.
- Accessibility: Moderate (requires a 20-minute walk from the access point).
- Recommendation: Development of a Sacred Geo-trail integrating Bamoun oral history and hydrovolcanology.

**GEOSITE DATA SHEET : PN-03**

| **CATEGORY** | **SPECIFICATIONS** |
| --- | --- |
| **Identification** | Name : Njitande Volcano |
| **Location** | Coordinates: 05°32'29’’N, 10°35'24" E (approx.) | Avg. Altitude : ~1150 m |
| **Morphology** | Type: Sub-rounded scoria cone |

**1. Scientific & Morphological Description**

- Genesis: Pure Strombolian volcanism characterized by rhythmic explosions. It represents a "dry" magmatic phase surimposed on the earlier regional morphology.
- Lithology: Accumulation of incandescent scoriaceous lava fragments (lapilli and scoria). Presence of granito-gneissic basement fragments within the pyroclastic ejecta on the rim.
- Morphometry: Internal crater slopes ~20°; external slopes 30–35°.
- Unique Feature: Excellent preservation of the monogenetic cone morphology, illustrating a typical transition from the nearby hydromagmatic systems to magmatic ones.

**2. Quantitative Assessment [1]**

| Indicator | Score (/400) | Justification |
| --- | --- | --- |
| Scientific Value (SV) | 315 | High representativeness of a monogenetic scoria cone; good integrity. |
| Potential Educational Use (PEU) | 320 | High didactic legibility for teaching magmatic vs. hydromagmatic dynamics. |
| Potential Touristic Use (PTU) | 290 | Significant landscape interest due to its proximity to the Mfouet system. |
| Degradation Risk (DR) | 110 | Low: Morphological features are currently well-preserved. |

**3. Management & Culture**

- Cultural Value: Low (primarily scientific interest).
- Accessibility: High (located approximately 1 km NE of Lake Mfouet).
- Recommendation: Protection from agricultural encroachment on external slopes; inclusion in the "Fire Trail" geocircuit.

**GEOSITE DATA SHEET : PN-04**

| **CATEGORY** | **SPECIFICATIONS** |
| --- | --- |
| **Identification** | Name : Mfoumben Volcano |
| **Location** | Coordinates: 05°32'53’’N, 10°35'59" E (approx.) | Avg. Altitude : ~1386 m |
| **Morphology** | Type : Stratovolcano |

**1. Scientific & Morphological Description**

- Genesis: Vigorous Strombolian activity with negligible water influence. Estimated rapid construction (growth rate ~1 m/day).
- Lithology: Alternating strata of ash, scoria, lapilli, and fusiform volcanic bombs, intercalated with basaltic lava flows.
- Morphometry: Third highest volcano in the Noun Plain. Distinct eastward breaching due to lava rafting and fluid emission.
- Unique Feature: Visible stratovolcanic structure and presence of large volcanic bombs indicating flow direction and eruption violence.

**2. Quantitative Assessment [1]**

| Indicator | Score (/400) | Justification |
| --- | --- | --- |
| Scientific Value (SV) | 345 | High value as a regional stratotype; indicators of eruptive kinetics. |
| Potential Educational Use (PEU) | 380 | MAX: Exceptional didactic legibility and panoramic regional views. |
| Potential Touristic Use (PTU) | 330 | High scenic appeal; significant potential for hiking and landscape observation. |
| Degradation Risk (DR) | 310 | High: Vulnerable to accelerated erosion and agropastoral pressure on slopes. |

**3. Management & Culture**

- Cultural Value: Moderate (Local landmark and essential for soil fertility/agriculture).
- Accessibility: Accessible via footpaths; 3 km South of Lake Monoun.
- Recommendation: Restoration of eroded slopes; installation of panoramic interpretive panels at the summit.

**GEOSITE DATA SHEET : PN-05**

| **CATEGORY** | **SPECIFICATIONS** |
| --- | --- |
| **Identification** | Name : Chapchap Volcano |
| **Location** | Coordinates: 05°33'18’’N, 10°37'15" E (approx.) | Avg. Altitude : ~1288 m |
| **Morphology** | Type : Scoria cone |

**1. Scientific & Morphological Description**

- Genesis: Typical Strombolian eruption. Magmatic gas expansion led to rhythmic explosions and a tephra plume that fertilized the surrounding plain with ash and lapilli.
- Lithology: Loose, permeable pyroclastic materials (scoria, blocks, lapilli). The final effusive phase caused the breaching of the cone towards the East.
- Morphometry: External slopes ~30°; notable flattening due to intensive farming.
- Unique Feature: This site is a primary example of ecosystem services, where volcanic fallout (saupoudrage) provides the essential mineral base for the region’s agricultural productivity.

**2. Quantitative Assessment [1]**

| Indicator | Score (/400) | Justification |
| --- | --- | --- |
| Scientific Value (SV) | 310 | High representativeness of scoria-fall processes and soil fertilization. |
| Potential Educational Use (PEU) | 320 | High didactic potential for teaching soil science and volcanic hazards. |
| Potential Touristic Use (PTU) | 280 | Good accessibility; panoramic view of the agricultural plain. |
| Degradation Risk (DR) | 380 | VERY HIGH: Destruction through scoria quarrying and slope leveling. |

**3. Management & Culture**

- Cultural Value: High economic importance linked to agricultural soil fertility.
- Accessibility: High; located SE of Monoun in the Nkwetkwet locality.
- Recommendation: Immediate regulation of quarrying; transformation of remaining sections into a "soil-volcano" educational trail.

**GEOSITE DATA SHEET : PN-06**

| **CATEGORY** | **SPECIFICATIONS** |
| --- | --- |
| **Identification** | Name : Lake Monoun |
| **Location** | Coordinates: 05°34'37’’N, 10°35'15" E (approx.) | Avg. Altitude : ~1090 m |
| **Morphology** | Type : Coalescent Multi-maar |

**1. Scientific & Morphological Description**

- Genesis: Complex polygénique system. Deep phreatic explosions (>500m) formed craters 1, 2, and 4. Craters 3 and 5 are shallower (~50m) and phreatomagmatic-to-strombolian.
- Lithology: Tephra-rich "pyroclastic crescent." Base-surge deposits with dunes/anti-dunes. Listric faults on inner walls exposing granitic basement and explosion breccias.
- Morphometry: Depth varies; Crater 2 reaches 96 m. Controlled by a major N70E tectonic shear zone.
- Unique Feature: Globally unique limnic hazard site. One of only three lakes worldwide with deep-seated magmatic CO₂ stratification.

**2. Quantitative Assessment [1]**

| Indicator | Score (/400) | Justification |
| --- | --- | --- |
| Scientific Value (SV) | 390 | INTERNATIONAL: Global reference for gas hazards and tectonic control. |
| Potential Educational Use (PEU) | 350 | High didactic potential for tectonics, stratigraphy, and risk management. |
| Potential Touristic Use (PTU) | 320 | High scenic beauty; "site of memory" regarding the 1984 disaster. |
| Degradation Risk (DR) | 350 | HIGH: Artisanal quarrying and slope instability on the inner rims. |

**3. Management & Culture**

- Cultural Value: Significant historical impact (1984 gas burst); sacred oral traditions regarding lake depths and local spirits.
- Accessibility: Legally regulated access; guarded site near Njindoun village.
- Recommendation: Strict enforcement of "No-Take" quarrying zones; maintenance of CO₂ degassing columns.

**GEOSITE DATA SHEET : PN-07**

| **CATEGORY** | **SPECIFICATIONS** |
| --- | --- |
| **Identification** | Name : Makwet Cone |
| **Location** | Coordinates: 05°35'22’’N, 10°34'50" E (approx.) | Avg. Altitude : ~1280 m |
| **Morphology** | Type : Strombolian scoria cone |

**1. Scientific & Morphological Description**

- Genesis: Result of rhythmic Strombolian activity. Scoriaceous lava packets were projected to build a cone surimposed on the previous morphology. Activity concluded with a degassed effusive phase.
- Lithology: Thick accumulations of scoria and lapilli. The site was heavily "dusted" by nearby volcanic centers, creating a highly fertile tephra-rich soil.
- Morphometry: Prominent relief culminating at 1280 m, directly overlooking Lake Monoun to the North.
- Unique Feature: Excellent vantage point for observing the spatial relationship between magmatic (Makwet) and hydromagmatic (Monoun) systems.

**2. Quantitative Assessment [1]**

| Indicator | Score (/400) | Justification |
| --- | --- | --- |
| Scientific Value (SV) | 320 | High interest in studying eruptive style superposition and spatial zonation. |
| Potential Educational Use (PEU) | 330 | Clear morphological contrast and high visibility of scoria cone features. |
| Potential Touristic Use (PTU) | 335 | Spectacular panoramic view over the Monoun multi-maar system. |
| Degradation Risk (DR) | 210 | Medium: Erosion risk due to intensive agriculture on both flanks and within the crater. |

**3. Management & Culture**

- Cultural Value: High agrarian importance; local landmark overlooking the Njindoun village area.
- Accessibility: High; located directly North of Lake Monoun.
- Recommendation: Development of a "Viewpoint Trail" connecting Makwet to Monoun; promotion of agro-geotourism.

**GEOSITE DATA SHEET : PN-08**

| **CATEGORY** | **SPECIFICATIONS** |
| --- | --- |
| **Identification** | Name : Ngouondam Maar |
| **Location** | Coordinates: 05°36'39’’N, 10°33'30" E (approx.) | Avg. Altitude : ~1100 m |
| **Morphology** | Type : Low-rimmed maar |

**1. Scientific & Morphological Description**

- Genesis: Deep-seated hydromagmatic explosions (~500m depth) within the Pan-African basement. High steam pressure led to a high Volcanic Explosivity Index (VEI) compared to dry eruptions.
- Lithology: Thin pyroclastic deposits (10–40 m). The "crescent" is largely composed of pulverized granito-gneissic basement with minor juvenile basaltic material.
- Morphometry: Flat-topped appearance due to thin deposits; features a breach/outlet to the SE.
- Unique Feature: The lake water is exceptionally clear/limpid near the outlet, and the site is covered by a "dusting" of scoria from a neighboring Strombolian cone (500m away).

**2. Quantitative Assessment [1]**

| Indicator | Score (/400) | Justification |
| --- | --- | --- |
| Scientific Value (SV) | 290 | Interest in deep magma-water interaction processes in a crystalline basement. |
| Potential Educational Use (PEU) | 300 | Good didactic potential for explaining "low-relief" volcanic landforms. |
| Potential Touristic Use (PTU) | 260 | Scenic beauty of the clear water, though partially masked by agriculture. |
| Degradation Risk (DR) | 190 | Medium: Susceptibility to siltation and masking by intensive farming. |

**GEOSITE DATA SHEET : PN-09**

| **CATEGORY** | **SPECIFICATIONS** |
| --- | --- |
| **Identification** | Name: Petpenoun Lakes and Domain |
| **Location** | Coordinates: 5°37'59’’N, 10°38'10" E (approx.) | Avg. Altitude : ~1130 m |
| **Morphology** | Type : Volcanic Dam Lakes |

**1. Scientific & Morphological Description**

- Genesis: Non-explosive formation. Basaltic lava flows from Nkoambeng (PN-10) dammed a pre-existing river valley. Water accumulated upstream of the lava barrier to form the Eastern Lake, which eventually breached to create the Western lake.
- Lithology: Basaltic lava dam resting on a granito-gneissic substratum.
- Morphometry: Total area ~0.63 km². Petpenoun-East: 0.49 km² (depth ~12m). Petpenoun-West : 0.14 km².
- Unique Feature: Known as "The two children of the lake" in Bamoun lore, this site is the most iconic regional example of lava-stream interaction.

**2. Infrastructure and Access**

- Access: High-quality access from Kouoptamo (20-minute drive). Features a private unpaved airstrip suitable for helicopters and small aircraft.
- Facilities: "Domaine de Petpenoun" (private resort) featuring luxury lodging (boukarous), a golf course, restaurant, and nautical facilities (canoeing).
- Environment: Meticulously maintained gardens and lawns contrasting with the surrounding wild volcanic landscape.

**3. Quantitative Assessment [1]**

| Indicator | Score (/400) | Justification |
| --- | --- | --- |
| Scientific Value (SV) | 330 | Rare example of a well-documented lava-dam system in the CVL. |
| Potential Educational Use (PEU) | 310 | Clear illustration of volcanic-hydrological interactions. |
| Potential Touristic Use (PTU) | 395 | MAX: Superior regional infrastructure and landscape beauty. |
| Degradation Risk (DR) | 120 | Low : Private management ensures site maintenance and safety. |

4. Management & Culture

- Cultural Value: Significant Bamoun oral history link. Protected by Law No. 2016/006 as a national natural site.
- Recommendation: Development as the "Geopark Gateway" to centralize regional interpretative resources.

**GEOSITE DATA SHEET : PN-10**

| **CATEGORY** | **SPECIFICATIONS** |
| --- | --- |
| **Identification** | Name : Nkoambeng Volcano |
| **Location** | Coordinates: 5°37'24’’N, 10°37'46" E (approx.) | Avg. Altitude : ~1240 m |
| **Morphology** | Type : Massive Strombolian Cone |

**1. Scientific & Morphological Description**

- Genesis: Monogenetic eruption with a primary explosive Strombolian phase followed by a viscuous effusive phase that breached the crater.
- Lithology: Basanites characterized by "green-core" clinopyroxenes (Wollastonite-Hedenbergite). Features aa-type lava flows and block-and-ash deposits.
- Morphometry: Basal diameter ~700 m (largest cone in the area).
- Unique Feature: Critical scientific evidence of magma mixing between mafic and evolved melts under the Noun Plain.

**2. Quantitative Assessment [1]**

| Indicator | Score (/400) | Justification |
| --- | --- | --- |
| Scientific Value (SV) | 395 | MAX: Petrological rarity and regional geological significance. |
| Potential Educational Use (PEU) | 340 | High legibility of lava flows and internal cone structure. |
| Potential Touristic Use (PTU) | 310 | Panoramic view over the Petpenoun system. |
| Degradation Risk (DR) | 360 | HIGH: Active artisanal quarrying and agricultural encroachment. |

**3. Management & Culture**

- Cultural Value: Source of local building materials; part of the "Water and Fire" narrative (source of the Petpenoun dam).
- Accessibility: 30-minute walk from the Petpenoun Domain.
- Recommendation: Immediate regulation of quarrying activities to protect the "aa" lava flow structures.

**GEOSITE DATA SHEET : PN-11**

| **CATEGORY** | **SPECIFICATIONS** |
| --- | --- |
| **Identification** | Name : Kechuentim Volcano |
| **Location** | Coordinates: 5°37'49’’N, 10°38'28" E (approx.) | Avg. Altitude : ~1220 m |
| **Morphology** | Type: Truncated Multi-crater Cone |

**1. Scientific & Morphological Description**

- Genesis: Polyphasic eruption with significant explosive Strombolian cycles building a complex summit. Concluded with visceral aa-type lava flows directed toward the North.
- Lithology: Basanitic lavas featuring green-core clinopyroxenes, identical to the Nkoambeng signature. Surface covered by sharp, angular basaltic blocks.
- Morphometry: 140 m high cone. The summit consists of several nested craters, one of which hosts the Tchoua Maar (PN-12).
- Unique Feature: Viewpoint Connection: The eastern flank offers the most complete panoramic view of the Petpenoun Domain and the entire volcanic-hydrological system.

**2. Quantitative Assessment [1]**

| Indicator | Score (/400) | Justification |
| --- | --- | --- |
| Scientific Value (SV) | 380 | Exceptional petrological evidence of magma mixing and structural complexity. |
| Potential Educational Use (PEU) | 340 | High legibility of multi-crater structures and lava flow surfaces. |
| Potential Touristic Use (PTU) | 310 | High panoramic value; essential stop for regional "landscape reading." |
| Degradation Risk (DR) | 220 | Medium: Natural erosion of crater rims and agricultural pressure. |

**3. Management & Culture**

- Cultural Value: Significant for local agrarian history (banana plantations in craters).
- Accessibility: Accessible via the East flank (less steep); 45-minute trek from Petpenoun.
- Recommendation: Designation as a primary "Scientific Belvedere" for the Geopark.

**GEOSITE DATA SHEET : PN-12**

| **CATEGORY** | **SPECIFICATIONS** |
| --- | --- |
| **Identification** | Name : Tchoua Maar |
| **Location** | Coordinates: 5°37'44’’N, 10°38'45" E (approx.) | Avg. Altitude : ~1150 m |
| **Morphology** | Type: Multi-maar / Tuff-ring |

**1. Scientific & Morphological Description**

- Genesis: Violent phreatomagmatic explosion (fuel-coolant interaction). Transitioned to a final Strombolian phase that built the surrounding tuff-ring.
- Lithology: Thick sequence of tephra, lapilli, and volcanic bombs.
- Morphometry: Depth ~25 m. Level is maintained by groundwater and rainfall, though internal faults cause periodic rim collapse and filling.
- Unique Feature: Nesting within the Kechuentim cone, representing a rare example of superimposed volcanic dynamics (Hydromagmatic within Magmatic).

**2. Quantitative Assessment [1]**

| Indicator | Score (/400) | Justification |
| --- | --- | --- |
| Scientific Value (SV) | 355 | Textbook example of eruptive transition and tuff-ring morphology. |
| Potential Educational Use (PEU) | 360 | High: Perfect "outdoor laboratory" for hydrovolcanology. |
| Potential Touristic Use (PTU) | 310 | Secluded, scenic beauty; high "discovery" value for hikers. |
| Degradation Risk (DR) | 130 | Low: Natural protection due to difficult, tortuous access. |

**3. Management & Culture**

- Cultural Value: High "mystical" value for locals due to its hidden position.
- Accessibility: Difficult; tortuous and unmarked trail North of Kechuentim's eastern flank.
- Recommendation: Trail blazing and safety securing to improve PEU while maintaining its secluded charm.

**GEOSITE DATA SHEET : PN-13**

| **CATEGORY** | **SPECIFICATIONS** |
| --- | --- |
| **Identification** | Name: Sanka-Ndoumkain (Nchout-Monoun) |
| **Location** | Coordinates: 5°40'12’’N, 10°32'06" E (approx.) | Avg. Altitude : ~1220 m |
| **Morphology** | Type : Phreatomagmatic Maar |

**1. Scientific & Morphological Description**

- Genesis: Formed by an explosive magma-water interaction within the crystalline basement, followed by a minor scoriaceous stabilization phase.
- Lithology: Pyroclastic deposits surrounding the crater; floor consists of granito-gneissic fragments.
- Morphometry: Surface area ~14 ha. Depth varies between 13 and 16 m.
- Unique Feature: Linguistic Heritage: Locally known as "Nchout-Monoun," this site is deeply embedded in Bamoun toponymy and oral history.

**2. Quantitative Assessment [1]**

| Indicator | Score (/400) | Justification |
| --- | --- | --- |
| Scientific Value (SV) | 280 | Representative of small-scale phreatomagmatism on the CVL basement. |
| Potential Educational Use (PEU) | 290 | Good illustration of lacustrine ecosystem balance. |
| Potential Touristic Use (PTU) | 310 | High scenic value due to dense vegetation (banana trees/shrubs). |
| Degradation Risk (DR) | 240 | Medium: Threatened by agricultural runoff and eutrophication. |

**3. Management & Culture**

- Cultural Value: High local recognition; integral part of the regional "Water" circuit.
- Accessibility: Accessible by motorcycle only via the Mbankouop-Ola station route.
- Recommendation: Ecological monitoring of water quality; promotion of its cultural history.

**GEOSITE DATA SHEET : PN-14**

| **CATEGORY** | **SPECIFICATIONS** |
| --- | --- |
| **Identification** | Name : Njigoumbe Dome |
| **Location** | Coordinates: 5°40'43’’N, 10°36'06" E (approx.) | Avg. Altitude : ~1530 m |
| **Morphology** | Type : Intrusive Dome (Protrusion) |

**1. Scientific & Morphological Description**

- Genesis: Formed by the vertical growth of highly viscous magma within the volcanic conduit. Exhumed by erosion to form a prominent relief.
- Lithology: Granitic rocks with a characteristic phaneritic (grenue) texture, revealing the slow cooling of the sub-volcanic body.
- Morphometry: One of the highest peaks in the Noun Plain.
- Unique Feature: Rare example of intrusive protrusion in a field dominated by effusive scoria cones.

**2. Industrial Threat Analysis**

- Threat Type: Large-scale industrial mining.
- Active Agent : Razel-Fayat construction company.
- Impact: Systematic removal of the granitic basement for regional road construction. The western flank is currently a massive open-pit quarry, leading to the irreversible loss of the dome's original morphology and stratigraphic record.

**3. Quantitative Assessment [1]**

| Indicator | Score (/400) | Justification |
| --- | --- | --- |
| Scientific Value (SV) | 315 | High interest for intrusive dynamics study. |
| Potential Educational Use (PEU) | 340 | High didactic value for explaining "hidden" volcanic plumbing. |
| Potential Touristic Use (PTU) | 250 | Low due to industrial exclusion zones and noise. |
| Degradation Risk (DR) | 400 | MAXIMUM: Active physical destruction by mining. |

**4. Management & Culture**

- Cultural Value: Significant as a regional economic resource; landmark peak.
- Accessibility: High; located on the main Foumbot-Foumban road.
- Recommendation: Negotiation of a "Geoconservation Buffer" to preserve the summit; installation of signage explaining the industrial-geological conflict.

**GEOSITE DATA SHEET : PN-15**

| **CATEGORY** | **SPECIFICATIONS** |
| --- | --- |
| **Identification** | Name : Ngouen Volcano |
| **Location** | Coordinates: 5°40'08’’N, 10°34'55" E (approx.) | Avg. Altitude : ~1340 m |
| **Morphology** | Type : Strombolian Scoria Cone |

**1. Scientific & Morphological Description**

- Genesis: Typical monogenetic eruption involving a dominant explosive phase (cone building) followed by a terminal effusive phase.
- Lithology: Scoriaceous lapilli and blocks. Presence of aa-type lava flows, similar to the Nkoambeng and Kechuentim systems.
- Morphometry: Satellite cone situated 300 m from the Njigoumbé industrial quarry.
- Unique Feature: Excellent example of a satellite vent, demonstrating the spatial density of monogenetic volcanism in the Kouoptamo sector.

**2. Quantitative Assessment [1]**

| Indicator | Score (/400) | Justification |
| --- | --- | --- |
| Scientific Value (SV) | 270 | Representative of regional monogenetic scoria cone dynamics. |
| Potential Educational Use (PEU) | 280 | Good legibility of crater morphology and associated lava flows. |
| Potential Touristic Use (PTU) | 280 | Accessible site with scenic volcanic views. |
| Degradation Risk (DR) | 210 | Medium: Threatened by the potential expansion of nearby industrial mining. |

**3. Management & Culture**

- Cultural Value: Local landmark near the Chans Njingoumbé public school.
- Accessibility: Very High; located at the edge of the Foumbot-Foumban main road.
- Recommendation: Protection as a secondary educational site to complement the Njigoumbé dome study.

**GEOSITE DATA SHEET : PN-16**

| **CATEGORY** | **SPECIFICATIONS** |
| --- | --- |
| **Identification** | Name : Maar Nfou |
| **Location** | Coordinates: 05°32'58’’N, 10°42'10" E (approx.) | Avg. Altitude : ~1500 m |
| **Morphology** | Type : Tuff-cone / Maar |

**1. Scientific & Morphological Description**

- Genesis: Violent phreatomagmatic explosion characterized by base surges (nuées déferlantes basales) and vertical plumes. The cone was built by successive chaotic accumulations of lapilli, ash, and scoria.
- Lithology: Alternating layers of fine ash and scoriaceous lapilli.
- Morphometry: Cone height 50–200 m; crater depth 58 m. Features steep external slopes (45-50°).
- Unique Feature: Pristine Integrity: One of the best-preserved phreatomagmatic structures on the northern flank of the Mbapit Massif.

**2. Ecological Synergy**

- Biodiversity: Hosts a dense gallery forest within its crater, providing a sheltered microclimate for diverse flora and fauna.
- Ecosystem Services: Functions as an isolated "ecological island" within the volcanic chain, essential for maintaining regional biodiversity and avian migration stops.
- Status: Protected as a natural site by the Ministry of Tourism and Leisure.

**3. Quantitative Assessment [1]**

| Indicator | Score (/400) | Justification |
| --- | --- | --- |
| Scientific Value (SV) | 350 | High integrity and presence of clear base-surge indicators. |
| Potential Educational Use (PEU) | 350 | Excellent site for teaching hydrovolcanology and "azonal" ecology. |
| Potential Touristic Use (PTU) | 340 | High aesthetic value (green waters) and favorable visiting conditions. |
| Degradation Risk (DR) | 100 | Low: Naturally protected by its topography and legal status. |

**4. Management & Culture**

- Cultural Value: Significant regional landmark; high "pristine" aesthetic appeal.
- Accessibility: Favorable (200 m SW of South Volcano).
- Recommendation: Training of "Eco-Geo-Guides" to explain both the geomorphology and the unique crater ecosystem.

**GEOSITE DATA SHEET : PN-17**

| **CATEGORY** | **SPECIFICATIONS** |
| --- | --- |
| **Identification** | Name : Mbapit Peak |
| **Location** | Coordinates: 05°33'35’’N, 10°42'53" E (approx.) | Avg. Altitude : ~1771 m |
| **Morphology** | Type: Rhyolitic Protrusion (Dome/Needle) |

**1. Scientific Bimodality**

- Significance: This site is the primary evidence of magmatic bimodality in the Noun Plain. It represents a transition from mafic (basaltic) to highly evolved, viscous acidic magmas (rhyolites).
- Genesis: Vertical extrusion of viscous lava through a structural fissure, creating a protrusion needle. Continuous internal pressure forced the upward growth.
- Unique Feature: Prismation: The NE face exhibits irregular columnar jointing (prismation), which has been fractured by diaclases, leading to spectacular vertical cliffs.

**2. Scientific & Morphological Description**

- Lithology: Viscous rhyolitic lavas surmounting a basaltic base.
- Morphometry: Highest point in the study area. The summit at 1771 m is a narrow platform (60x80m). To the South (1560m) lies a lava-dome-flow (*dôme-coulée*).
- Landscape: Deep V-shaped valleys with gallery forests separate the acidic protrusions from the surrounding basaltic plateaus.

**3. Quantitative Assessment [1]**

| Indicator | Score (/400) | Justification |
| --- | --- | --- |
| Scientific Value (SV) | 395 | MAX: Key regional reference for Eocene bimodal magmatism. |
| Potential Educational Use (PEU) | 385 | High didactic potential for explaining magmatic differentiation. |
| Potential Touristic Use (PTU) | 380 | High: Spectacular "alpine" landscape and panoramic views. |
| Degradation Risk (DR) | 120 | Low: Naturally protected by extreme slopes and difficult access. |

**4. Management & Culture**

- Accessibility: Difficult; requires strenuous trekking.
- Recommendation: Development of a "Summit Geo-trail" with safety cables; training of specialized mountain guides.

**GEOSITE DATA SHEET : PN-18**

| **CATEGORY** | **SPECIFICATIONS** |
| --- | --- |
| **Identification** | Name : South Volcano |
| **Location** | Coordinates: 05°33'12’’N, 10°42'10" E (approx.) | Avg. Altitude : ~1841 m |
| **Morphology** | Type : Holomagmatic scoria cone |

**1. Scientific & Morphological Description**

- Genesis: Pure holomagmatic explosive eruption under high gas pressure. Built solely from juvenile materials.
- Lithology: Intact accumulation of lapilli, ash, scoria, and spindle bombs.
- Morphometry: Features "base-of-cone" lava flows (*coulées de bas-de-cône*) which caused a slight breaching of the NE rim. Internal slopes ~20°; external slopes ~35°.
- Unique Feature: Exceptional integrity of the primary volcanic profile, providing a "reference model" for scoria cones in the Mbapit sector.

**2. Quantitative Assessment [1]**

| Indicator | Score (/400) | Justification |
| --- | --- | --- |
| Scientific Value (SV) | 305 | Representative of pure magmatic explosive dynamics. |
| Potential Educational Use (PEU) | 310 | High legibility of external and internal cone morphology. |
| Potential Touristic Use (PTU) | 310 | Strong aesthetic appeal due to its well-preserved shape. |
| Degradation Risk (DR) | 110 | Low: Site remains mostly undisturbed. |

3. Management & Culture

- Accessibility: Favorable; 200 m NE of Lake Nfou.
- Recommendation: Installation of interpretive panels on cone-building kinetics.

**GEOSITE DATA SHEET : PN-19**

| **CATEGORY** | **SPECIFICATIONS** |
| --- | --- |
| **Identification** | Name : Tam-chi Depression |
| **Location** | Coordinates: 05°33' N, 10°44’ E (approx.) | Avg. Altitude : ~1100 m |
| **Morphology** | Type: Tectonic Graben / U-shaped valley |

**1. Scientific & Morphological Description**

- Genesis: Tectonic subsidence resulting from the Noun Graben formation. Large-scale structural downfaulting (graben) between two mountain ranges.
- Lithology: Sedimentary and pyroclastic infilling overlying the downfaulted granito-gneissic basement.
- Morphometry: Covers an area of approximately
- Unique Feature: Key structural site for observing the regional graben morphology that controls the placement of the volcanic vents in the Noun Plain.

**2. Quantitative Assessment [1]**

| Indicator | Score (/400) | Justification |
| --- | --- | --- |
| Scientific Value (SV) | 290 | Illustrates the tectonic framework of the Cameroon Volcanic Line. |
| Potential Educational Use (PEU) | 250 | Didactic interest for large-scale structural geomorphology. |
| Potential Touristic Use (PTU) | 250 | Open landscape values, though less "spectacular" than volcanoes. |
| Degradation Risk (DR) | 230 | Medium: Risk of urban encroachment along the Foumbot-Koutaba axis. |

**3. Management & Culture**

- Accessibility: High; separates the cities of Foumbot and Koutaba.
- Recommendation: Land-use planning to prevent urban expansion from masking the structural borders of the valley.
