# Supplementary material
Source: Research Square preprint supplement (doi:10.21203/rs.3.rs-9665889/v1)
Supplement: Supplementary file 2 [file 6251df98ec0cf2a4ea9feefc.docx]

**Table 1** Criteria, indicators, and parameters used for the quantitative assessment of the scientific value of géosites (after [1])

**(Scientific value (SV)**

**Criteria/indicators Parameters**

1. **Representativeness**

The geosite is the best example in the study area to illustrate elements or processes, related with the geological framework under consideration (when applicable)

The geosite is a good example in the study area to illustrate elements or processes, related with the geological framework under consideration (when applicable)

The geosite reasonably illustrates elements or processes in the study area, related with the geological framework under consideration (when applicable)

1. **Key locality**

4 points

2 points

1 point

The geosite is recognised as a GSSP or ASSP by the IUGS or is an IMA reference site 4 points The geosite is used by international science, directly related with the geological framework under consideration (when applicable) 2 points

The geosite is used by national science, directly related with the geological framework under consideration (when applicable) 1 point

1. **Scientific knowledge**

There are papers in international scientific journals about this geosite, directly related with the geological framework under consideration (when applicable)

There are papers in national scientific publications about this geosite, directly related with the geological framework under consideration (when applicable)

There are abstracts presented in international scientific events about this geosite, directly related with the geological framework under consideration (when applicable)

1. **Integrity**

4 points

2 points

1 point

The main geological elements (related with the geological framework under consideration, when applicable) are very well preserved 4 points

Geosite not so well preserved, but the main geological elements (related with the geological framework under consideration, when applicable) are still preserved

Geosite with preservation problems and with the main geological elements (related with the geological framework under consideration, when applicable) quite altered or modified

1. **Geological diversity**

2 points

1 point

Geosite with more than three types of distinct geological features with scientific relevance 4 points

Geosite with three types of distinct geological features with scientific relevance 2 points

Geosite with two types of distinct geological features with scientific relevance 1 point

1. **Rarity**

The geosite is the only occurrence of this type in the study area (representing the geological framework under consideration, when applicable)

In the study area, there are two to three examples of similar geosites (representing the geological framework under consideration, when applicable)

In the study area, there are four to five examples of similar geosites (representing the geological framework under consideration, when applicable)

1. **Use limitations**

4 points

2 points

1 point

The geosite has no limitations (legal permissions, physical barriers…) for sampling or fieldwork 4 points

It is possible to collect samples and do fieldwork after overcoming the limitations 2 points

Sampling and fieldwork are very hard to be accomplished due to limitations difficult to overcome (legal permissions, physical barriers…)

1 point

**Table 2** Criteria, indicators, and parameters used for the quantitative assessment of the potential educational and touristic uses. Ten criteria (A–J) are shared between these two types of uses. Two more criteria (K–L) are used to assess PEU and three (K–M) for PTU (according from [1])

**POTENTIAL EDUCATIONAL AND TOURISTIC USES**

Criteria/indicators

Parameters

1. **Vulnerability**

| The geological elements of the geosite present no possible deterioration by anthropic activity | 4 points |
| --- | --- |
| There is the possibility of deterioration of secondary geological elements by anthropic activity | 3 points |
| There is the possibility of deterioration of main geological elements by anthropic activity | 2 points |
| There is the possibility of deterioration of all geological elements by anthropic activity | 1 point |

1. **Accessibility**

| Site located less than 100 m from a paved road and with bus parking | 4 points |
| --- | --- |
| Site located less than 500 m from a paved road | 3 points |
| Site accessible by bus but through a gravel road | 2 points |
| Site with no direct access by road but located less than 1 km from a road accessible by bus | 1 point |

1. **Use limitations**

| The site has no limitations to be used by students and tourists | 4 points |
| --- | --- |
| The site can be used by students and tourists but only occasionally | 3 points |
| The site can be used by students and tourists but only after overcoming limitations (legal, permissions, physical, tides, floods, …) | 2 points |
| The use by students and tourists is very hard to be accomplished due to limitations difficult to overcome (legal, permissions, physical, tides, floods, …) | 1 point |

1. **Safety**

| Site with safety facilities (fences, stairs, handrails, etc.), mobile phone coverage and located less than 5 km from emergency services | 4 points |
| --- | --- |
| Site with safety facilities (fences, stairs, handrails, etc.), mobile phone coverage and located less than 25 km from emergency services | 3 points |
| Site with no safety facilities but with mobile phone coverage and located less than 50 km from emergency services | 2 points |
| Site with no safety facilities, no mobile phone coverage and located more than 50 km from emergency services | 1 point |

1. **Logistics**

| Lodging and restaurants for groups of 50 persons less than 15 km away from the site | 4 points |
| --- | --- |
| Lodging and restaurants for groups of 50 persons less than 50 km away from the site | 3 points |
| Lodging and restaurants for groups of 50 persons less than 100 km away from the site | 2 points |
| Lodging and restaurants for groups less than 25 persons and less than 50 km away from the site | 1 point |

1. **Density of population**

| Site located in a municipality with more than 1000 inhabitants/km2 | 4 points |
| --- | --- |
| Site located in a municipality with 250-1000 inhabitants/km2 | 3 points |
| Site located in a municipality with 100-250 inhabitants/km2 | 2 points |
| Site located in a municipality with less than 100 inhabitants/km2 | 1 point |

1. **Association with other values**

| Occurrence of several ecological and cultural values less than 5 km away from the site | 4 points |
| --- | --- |
| Occurrence of several ecological and cultural values less than 10 km away from the site | 3 points |
| Occurrence of one ecological value and one cultural value less than 10 km away from the site | 2 points |
| Occurrence of one ecological or cultural value less than 10 km away from the site | 1 point |

1. **Scenery**

| Site currently used as a tourism destination in national campaigns | 4 points |
| --- | --- |
| Site occasionally used as a tourism destination in national campaigns | 3 points |
| Site currently used as a tourism destination in local campaigns | 2 points |
| Site occasionally used as a tourism destination in local campaigns | 1 point |

1. **Uniqueness**

| The site shows unique and uncommon features considering this and neighbouring countries | 4 points |
| --- | --- |
| The site shows unique and uncommon features in the country | 3 points |
| The site shows common features in this region but they are uncommon in other regions of the country | 2 points |
| The site shows features rather common in the whole country | 1 point |

1. **Observation conditions**

| All geological elements are observed in good conditions | 4 points |
| --- | --- |
| There are some obstacles that make difficult the observation of some geological elements | 3 points |
| There are some obstacles that make difficult the observation of the main geological elements | 2 points |
| There are some obstacles that almost obstruct the observation of the main geological elements | 1 point |

**Table 2** (continued)

| **POTENTIAL EDUCATIONAL USE** | | **POTENTIAL TOURISTIC USE** | |
| --- | --- | --- | --- |
| **K. Didactic potential** | | **K. Interpretative potential** | |
| The site presents geological elements that are taught in all teaching levels | 4 points | The site presents geological elements in a very clear and  expressive way to all types of publics | 4 points |
| The site presents geological elements that are taught in elementary  schools | 3 points | The public needs to have some geological background to  understand the geological elements of the site | 3 points |
| The site presents geological elements that are taught in secondary schools | 2 points | The public needs to have solid geological background to understand the geological elements of the site | 2 points |
| The site presents geological elements that are taught in the  university | 1 point | The site presents geological elements only understandable to  geological experts | 1 point |
| **L. Geological diversity** | | **L. Economic level** | |
| More than 3 types of geodiversity elements occur in the site (mineralogical, palaeontological, geomorphological, etc.) | 4 points | The site is located in a municipality with a household income at least the double of the national average | 4 points |
| There are 3 types of geodiversity elements in the site | 3 points | The site is located in a municipality with a household income higher than the national average | 3 points |
| There are 2 types of geodiversity elements in the site | 2 points | The site is located in a municipality with a household income  similar to the national average | 2 points |
| There is only 1 type of geodiversity element in the site | 1 point | The site is located in a municipality with a household income lower than the national average | 1 point |
|  | | **M. Proximity of recreational areas** | |
| Site located less than 5 km from a recreational area or tourist attraction | 4 points |
| Site located less than 10 km from a recreational area or tourist  attraction | 3 points |
| Site located less than 15 km from a recreational area or tourist attraction | 2 points |
| Site located less than 20 km from a recreational area or tourist  attraction | 1 point |

**Table 3**

Criteria, indicators, and parameters used for the quantitative assessment of degradation risk (DR) of sites (according from [1])

**Degradation risk**

**Criteria/indicators Parameters**

1. **Deterioration of geological elements**

Possibility of deterioration of all geological elements 4 points

Possibility of deterioration of the main geological elements 3 points

Possibility of deterioration of secondary geological elements 2 points

Minor possibility of deterioration of secondary geological elements 1 point

1. **Proximity to areas/activities with potential to cause degradation**

Site located less than 50 m of a potential degrading area/activity 4 points

Site located less than 200 m of a potential degrading area/activity 3 points

Site located less than 500 m of a potential degrading area/activity 2 points

Site located less than 1 km of a potential degrading area/activity 1 point

1. **Legal protection**

Site located in an area with no legal protection and no control of access 4 points

Site located in an area with no legal protection but with control of access 3 points

Site located in an area with legal protection but no control of access 2 points

Site located in an area with legal protection and control of access 1 point

1. **Accessibility**

Site located less than 100 m from a paved road and with bus parking 4 points

Site located less than 500 m from a paved road 3 points

Site accessible by bus through a gravel road 2 points

Site with no direct access by road but located less than 1 km from a road accessible by bus 1 point

1. **Density of population**

Site located in a municipality with more than 1000 inhabitants/km2 4 points

Site located in a municipality with 250–1000 inhabitants/km2 3 points

Site located in a municipality with 100–250 inhabitants/km2 2 points

Site located in a municipality with less than 100 inhabitants/km2 1 point
